# Supplementary material for: In situ growth-etching approach to the preparation of hierarchically macroporous zeolites with high MTO catalytic activity and selectivity
Source: Royal Society of Chemistry journal article supplement (doi:10.1039/c4ta03030c), 2014-09-01
Supplement: c4ta03030c1.pdf [file c4ta03030c1.pdf]

## Supplementary Information

# In-Situ Growth-Etching Approach to the Preparation of Hierarchically Macroporous Zeolites with High MTO Catalytic Activity and Selectivity

Dongyang Xi,<sup>a</sup> Qiming Sun,<sup>a</sup> Jun Xu,<sup>b</sup> Minhyung Cho,<sup>c</sup> Hae Sung Cho,<sup>c</sup> Shunsuke Asahina,<sup>d</sup> Yi Li,<sup>a</sup> Feng Deng,<sup>b</sup> Osamu Terasaki,<sup>c</sup> and Jihong Yu<sup>a,†</sup>

<sup>a</sup>State Key Laboratory of Inorganic Synthesis and Preparative Chemistry, College of Chemistry, Jilin University, Changchun 130012, P. R. China

<sup>b</sup>Wuhan Center for Magnetic Resonance, State Key Laboratory of Magnetic Resonance and Atomic and Molecular Physics, Wuhan Institute of Physics and Mathematics, the Chinese Academy of Sciences, Wuhan 430071, P. R. China

<sup>c</sup>Graduate School of EEWS, KAIST, Daejeon 305-701, Republic of Korea

<sup>d</sup>SMBU, JEOL, Akishima, Tokyo 196-8558, Japan

**Figure S1. TEM image of a fragment of the hierarchically macroporous SAPO-34 synthesized with  $\text{HF}/\text{Al}_2\text{O}_3 = 2.7$ .**

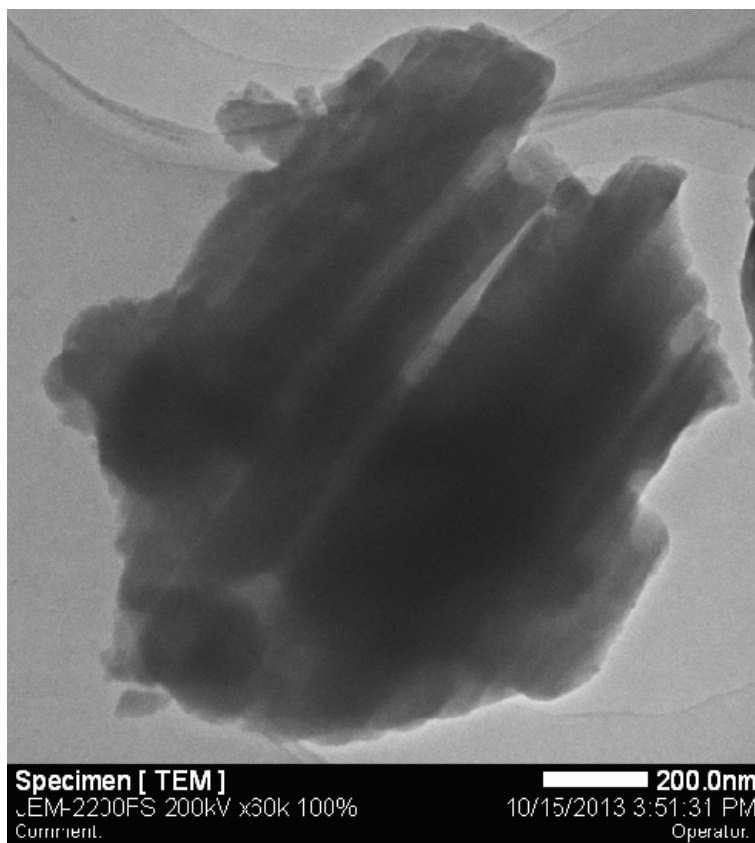

Figure S2. The XRD patterns of the hierarchically macroporous SAPO-34 synthesized with  $\text{HF}/\text{Al}_2\text{O}_3 = 1.9$  crystallized at 6 h, 12 h, 18 h and 24 h. Crystals crystallized at 6 h and 12 h are separated after the autoclaves are immediately quenched by water, while crystals crystallized at 18 h and 24 h are separated after the autoclaves are naturally cooled down to room temperature.

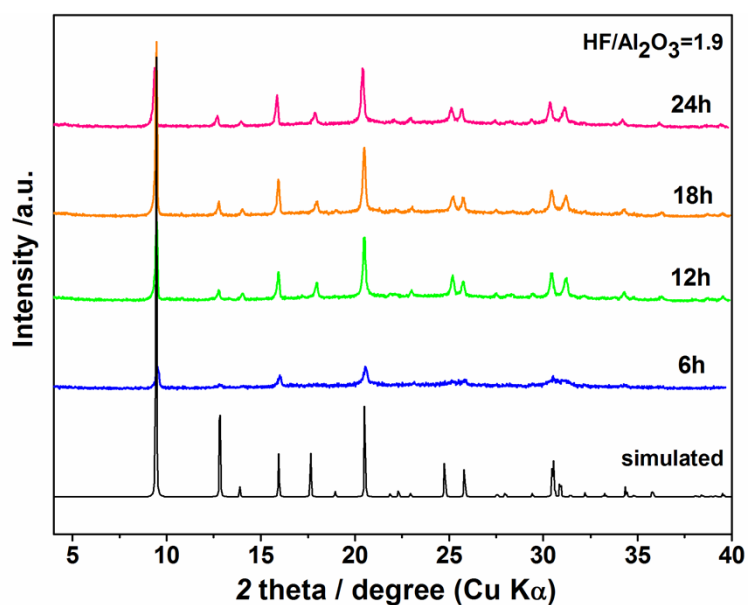

Figure S3. SEM images of the hierarchically macroporous SAPO-34 synthesized with HF/Al<sub>2</sub>O<sub>3</sub> of 1.9 from crystallization time at 6h (a)-(e), 12h (f)-(g) and 18h (h). Crystals at 6h and 12h were separated after the autoclaves are immediately quenched by water, while crystals at 18 h are separated after the autoclave is naturally cooled down to room temperature. The crystals shown in (b)-(e) are from the batch crystals of (a). The denoted part with the circle in (h) means big hole in the middle of the surface. a), f), g), h) were taken at 5mm working distance and b), c), d), e) were taken at 7mm working distance with 2.5keV accelerating voltage and 2kV stage bias.

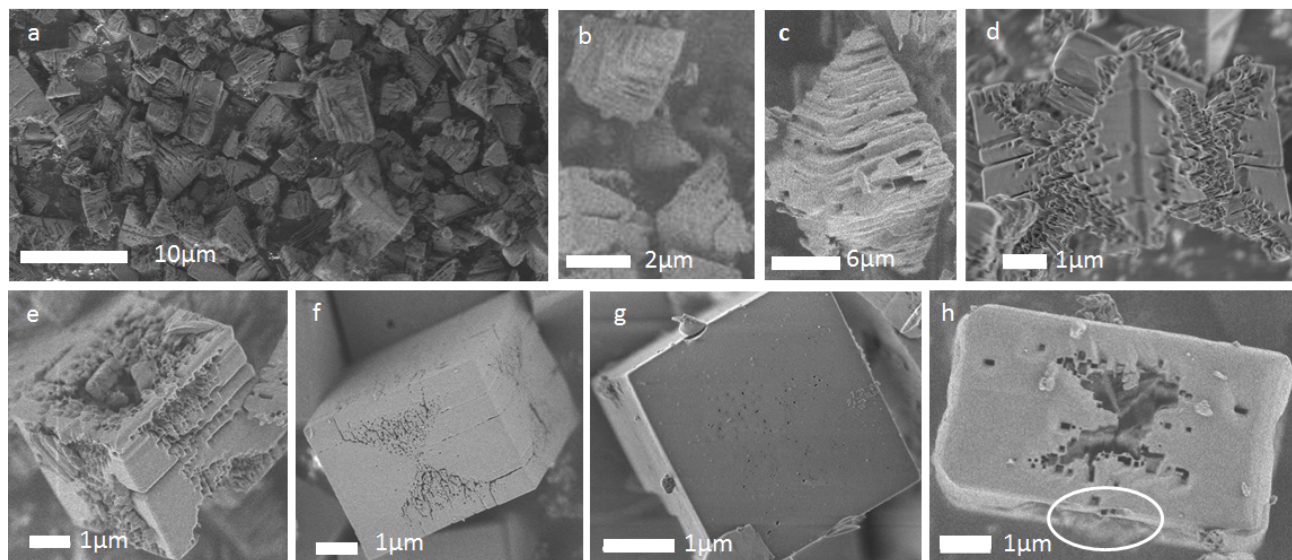

**Figure S4. SEM images of hierachically macroporous  $\text{AlPO}_4\text{-5}$  (AFI) synthesized by using the one-step hydrothermal method via in-situ growth-etching assisted by HF.**

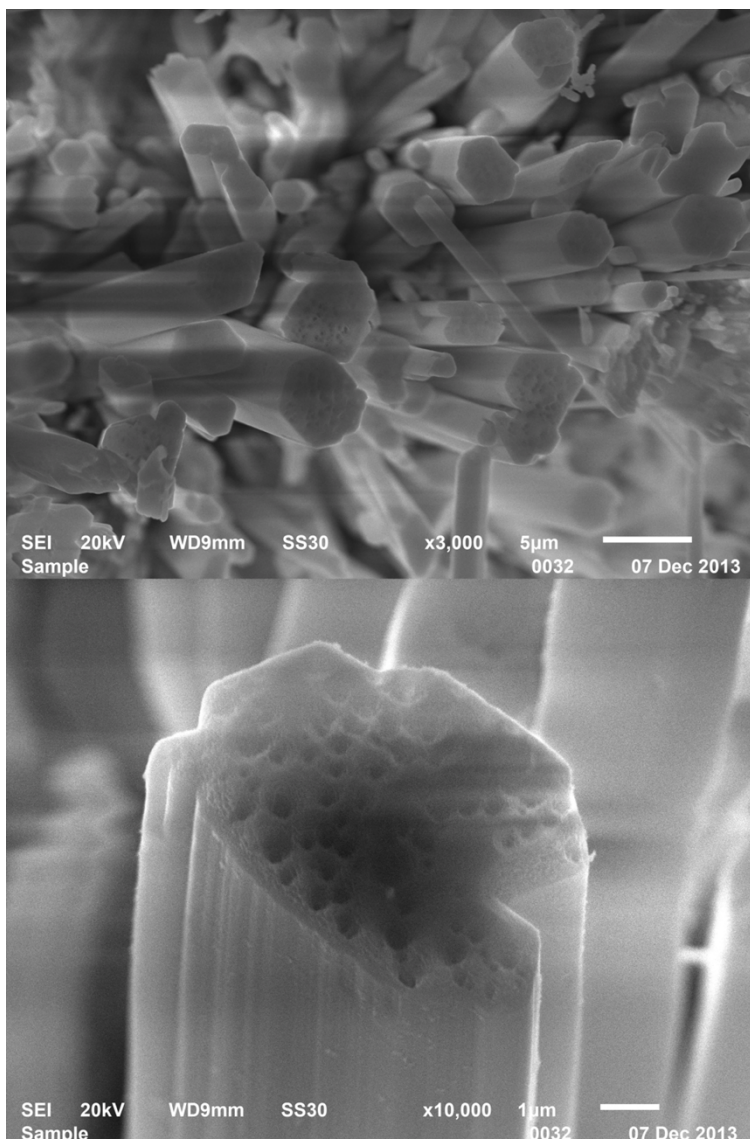

**Figure S5. Pore diameter distribution of the hierarchically macroporous SAPO-34 synthesized with HF/Al<sub>2</sub>O<sub>3</sub> of 1.9 determined by mercury porosimetry measurement.**

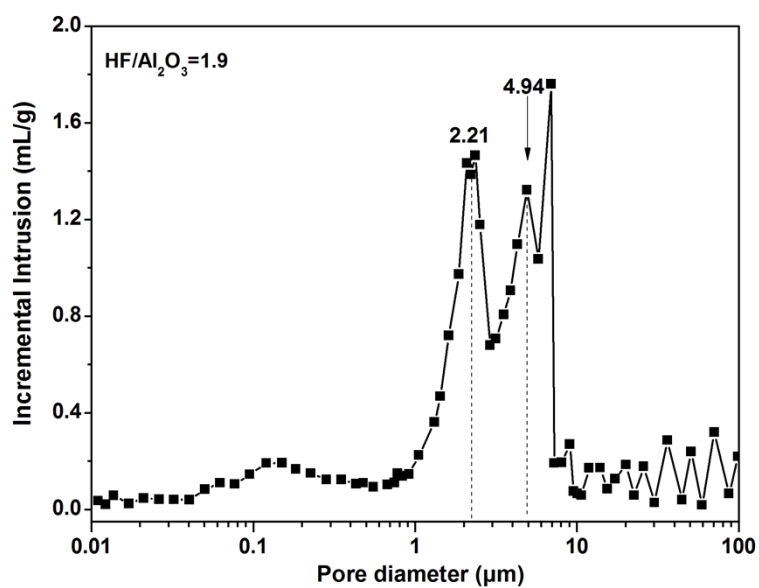

**Figure S6. Product selectivity of the hierarchically macroporous and conventional SAPO-34 catalysts for MTO conversion at 400 °C.**

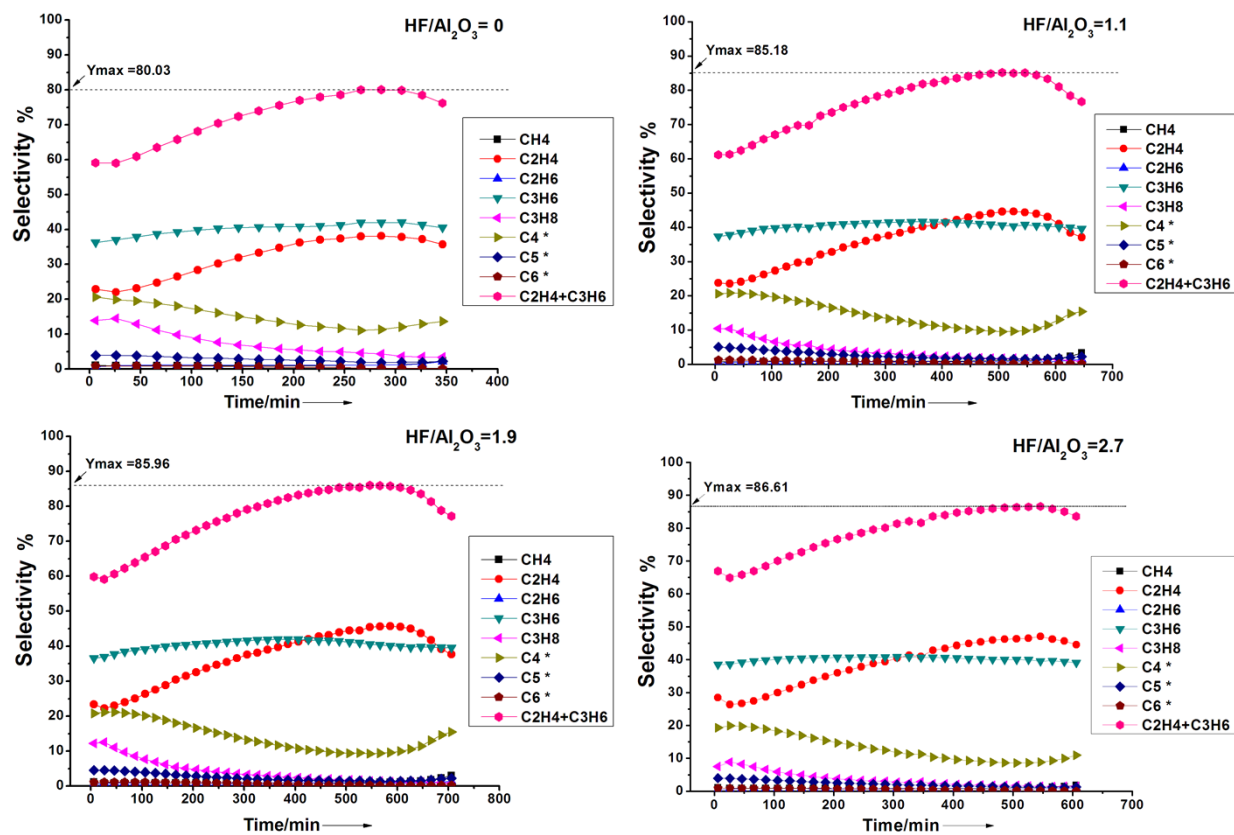

**Table S1. Molar compositions measured by ICP<sup>a</sup> and surface Si/(Al+P+Si) ratios measured by SEM-EDS<sup>b</sup> for the hierarchically macroporous and conventional SAPO-34.**

| samples                                | molar composition <sup>a</sup>                                         | Si/(Al+P+Si)<br>ratio <sup>b</sup> (surface) |
|----------------------------------------|------------------------------------------------------------------------|----------------------------------------------|
| HF/Al <sub>2</sub> O <sub>3</sub> =0   | Si <sub>0.09</sub> Al <sub>0.46</sub> P <sub>0.45</sub> O <sub>2</sub> | 0.10                                         |
| HF/Al <sub>2</sub> O <sub>3</sub> =1.1 | Si <sub>0.09</sub> Al <sub>0.46</sub> P <sub>0.45</sub> O <sub>2</sub> | 0.08                                         |
| HF/Al <sub>2</sub> O <sub>3</sub> =1.9 | Si <sub>0.10</sub> Al <sub>0.46</sub> P <sub>0.44</sub> O <sub>2</sub> | 0.08                                         |
| HF/Al <sub>2</sub> O <sub>3</sub> =2.7 | Si <sub>0.09</sub> Al <sub>0.46</sub> P <sub>0.45</sub> O <sub>2</sub> | 0.07                                         |



**Table S2. Molar compositions measured by ICP and by SEM-EDS for SAPO-34 samples synthesized with HF/A<sub>2</sub>O<sub>3</sub> of 1.9 at different crystallization time. <sup>a</sup> Samples are separated after the autoclaves are immediately quenched by water; <sup>b</sup> Samples are separated after the autoclaves are naturally cooled down to room temperature.**

| Crystallization  | Composition(ICP)                                                       | SEM-EDS                                                                |
|------------------|------------------------------------------------------------------------|------------------------------------------------------------------------|
| 6h               | Si <sub>0.11</sub> Al <sub>0.44</sub> P <sub>0.45</sub> O <sub>2</sub> | Si <sub>0.07</sub> Al <sub>0.47</sub> P <sub>0.46</sub> O <sub>2</sub> |
| 12h              | Si <sub>0.11</sub> Al <sub>0.45</sub> P <sub>0.44</sub> O <sub>2</sub> | Si <sub>0.08</sub> Al <sub>0.46</sub> P <sub>0.46</sub> O <sub>2</sub> |
| 18h <sup>a</sup> | Si <sub>0.11</sub> Al <sub>0.45</sub> P <sub>0.44</sub> O <sub>2</sub> | Si <sub>0.08</sub> Al <sub>0.46</sub> P <sub>0.46</sub> O <sub>2</sub> |
| 18h <sup>b</sup> | Si <sub>0.11</sub> Al <sub>0.46</sub> P <sub>0.43</sub> O <sub>2</sub> | Si <sub>0.09</sub> Al <sub>0.46</sub> P <sub>0.45</sub> O <sub>2</sub> |
| 24h <sup>a</sup> | Si <sub>0.11</sub> Al <sub>0.46</sub> P <sub>0.43</sub> O <sub>2</sub> | Si <sub>0.08</sub> Al <sub>0.45</sub> P <sub>0.47</sub> O <sub>2</sub> |
| 24h <sup>b</sup> | Si <sub>0.10</sub> Al <sub>0.47</sub> P <sub>0.43</sub> O <sub>2</sub> | Si <sub>0.08</sub> Al <sub>0.45</sub> P <sub>0.47</sub> O <sub>2</sub> |

**Table S3. Yields of main products versus time-on-stream for MTO reaction over the hierarchically macroporous SAPO-34 catalysts as compared with the conventional catalyst.**

| Samples                                | TOS (min) | Selectivity (%)* |                                   |                               |                               |                               |                  |                  |                                                              |
|----------------------------------------|-----------|------------------|-----------------------------------|-------------------------------|-------------------------------|-------------------------------|------------------|------------------|--------------------------------------------------------------|
|                                        |           | CH <sub>4</sub>  | <b>C<sub>2</sub>H<sub>4</sub></b> | C <sub>2</sub> H <sub>6</sub> | C <sub>3</sub> H <sub>6</sub> | C <sub>3</sub> H <sub>8</sub> | C <sub>4</sub> * | C <sub>5</sub> * | C <sub>2</sub> H <sub>4</sub> +C <sub>3</sub> H <sub>6</sub> |
| HF/Al <sub>2</sub> O <sub>3</sub> =0   | 226       | 1.0              | <b>36.2</b>                       | 1.1                           | 40.8                          | 5.4                           | 12.6             | 2.4              | 77.0                                                         |
| HF/Al <sub>2</sub> O <sub>3</sub> =1.1 | 486       | 1.0              | <b>42.9</b>                       | 0.8                           | 41.2                          | 2.0                           | 10.2             | 1.7              | 84.1                                                         |
| HF/Al <sub>2</sub> O <sub>3</sub> =1.9 | 526       | 0.9              | <b>43.2</b>                       | 0.8                           | 41.6                          | 1.9                           | 9.8              | 1.5              | 84.8                                                         |
| HF/Al <sub>2</sub> O <sub>3</sub> =2.7 | 446       | 0.9              | <b>44.3</b>                       | 0.8                           | 40.4                          | 2.1                           | 9.6              | 1.6              | 84.7                                                         |

\*100% The methanol conversion with the highest (ethylene + propylene) selectivity
